# Supplementary material for: BRCA2-DSS1 interaction is dispensable for RAD51 recruitment at replication-induced and meiotic DNA double strand breaks
Source: PubMed Central journal article supplement (PMC8975877; doi:10.1038/s41467-022-29409-y), 2022-04-01
Supplement: 41467_2022_29409_MOESM1_ESM.pdf [file 41467_2022_29409_MOESM1_ESM.pdf]

## SUPPLEMENTARY INFORMATION

### Supplementary Figure 1: Generation of *Brca2*<sup>L2431P</sup> knock-in mice.

a) Schematic representation of the targeting strategy to generate *Brca2*<sup>L2431P</sup> knock-in allele by homologous recombination in mESC. A targeting vector containing 5.4kb 5' homology and 4.5kb 3' homology arms and a *loxP-PGK-neo-loxP* cassette for positive selection and *Thymidine Kinase (TK)* for negative selection was used to target the wild type locus (*Brca2*<sup>WT</sup>). The 5' homology arm contains CTG<CCA mutation in exon 15 that results in a leucine to proline substitution in codon 2431. Homologous recombination of the targeting vector resulted in the generation of *Brca2*<sup>L2431P-Neo</sup> allele. Mice heterozygous for *Brca2*<sup>L2431P-Neo</sup> allele were crossed with Cre expressing mice to delete the *Neo* cassette leaving behind a single *loxP* site in intron 15 to generate the *Brca2*<sup>L2431P</sup> knock-in allele. Open boxes with numbers represent the exons with appropriate exon numbers and lines connecting the boxes represent the introns. Not drawn to scale. Relevant restriction sites are indicated, E: *EcoRV*; S: *SpeI*. b) We picked 72 G418 resistant colonies. Identified 19 to be correctly targeted by Southern analyses of genomic DNA digested with *SpeI* for 5' end targeting and *EcoRV* for 3' end targeting using probes shown in A (below the *Brca2*<sup>WT</sup> locus). c) The mutation was confirmed by sequence analysis (3 clones). d) Schematic representation of the *Brca2* null allele (*Brca2*<sup>Ko</sup>) showing deletion of 5' region of exon 11, which is replaced with human *HPRT1* minigene.

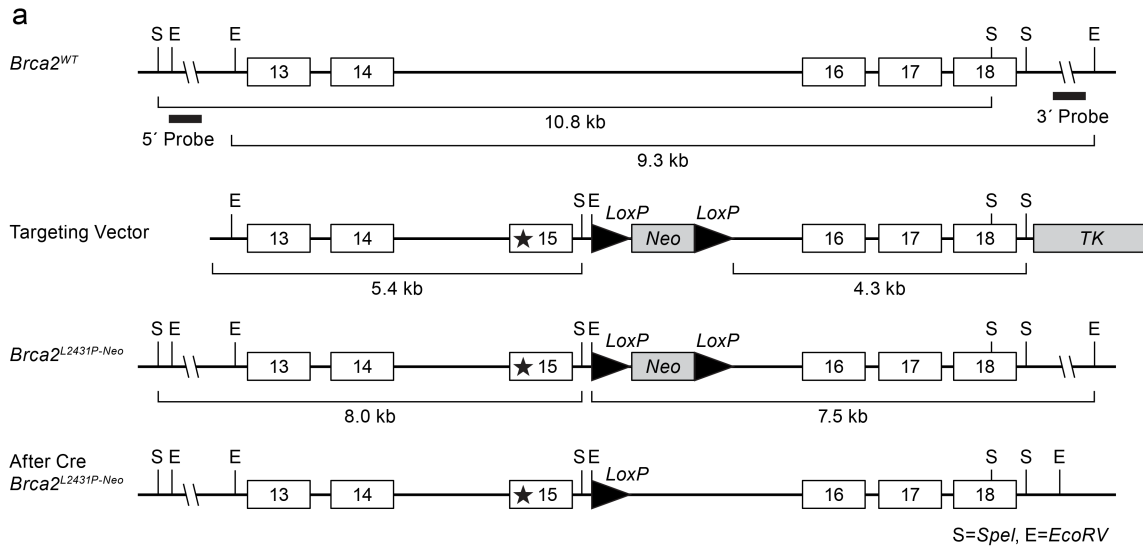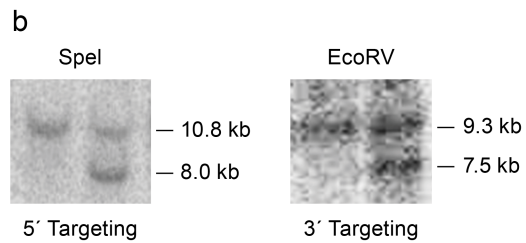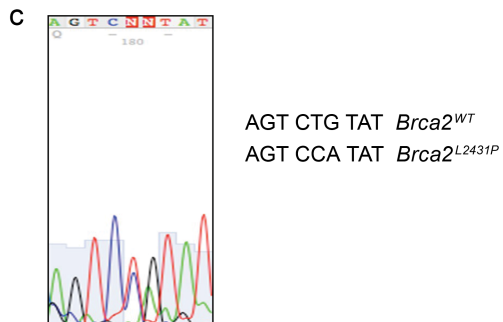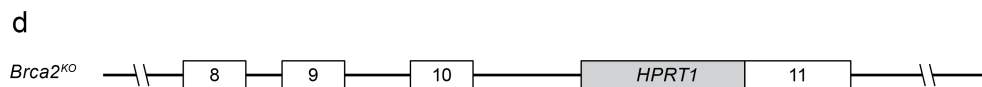

**Supplementary Figure 2: Whole mount of embryos and mammary gland .**

a) Image of embryos at 16.5dpc obtained from an *LP/+* intercross and from an *LP/+ X KO/+* mating. b) Image of embryos at 18.5dpc obtained from an *LP/+* intercross. c) H&E stained sagittal section of embryos at 16.5dpc of indicated genotypes. d) Representative images of carmine alum-stained mammary gland of 4-6 weeks old females of indicated genotype. The *LP/KO* mammary gland is smaller in size with reduced branching (scale bar=0.5cm). e) Quantification of number of terminal end buds observed in *WT* and *LP/KO* mammary glands. *LP/KO* shows significantly reduced number of terminal end buds as compared to *WT* (n=4 for *WT* and n=5 for *LP/KO*, Students two-tailed t-Test, error bar- SD of mean).

**a** 16.5 dpc

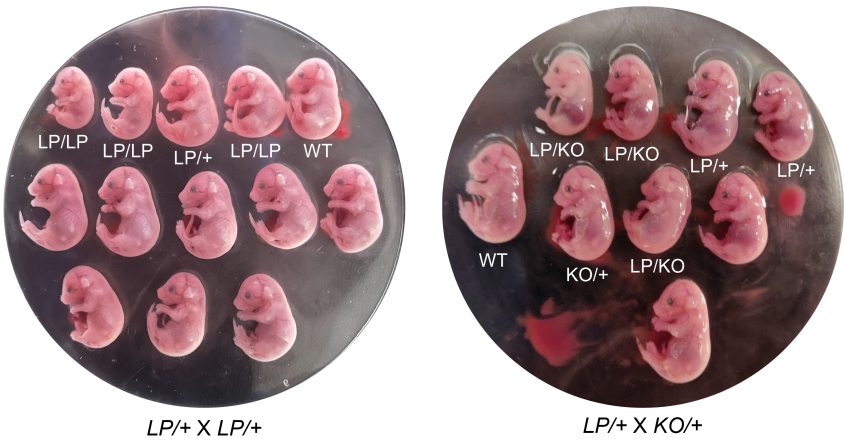

**b** 18.5 dpc

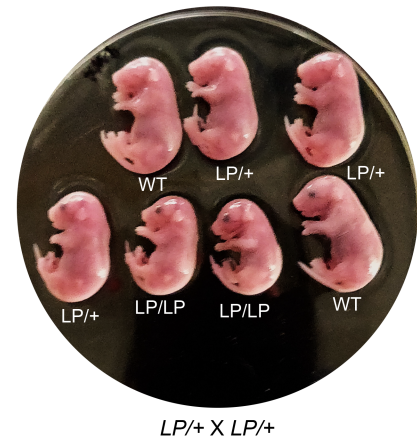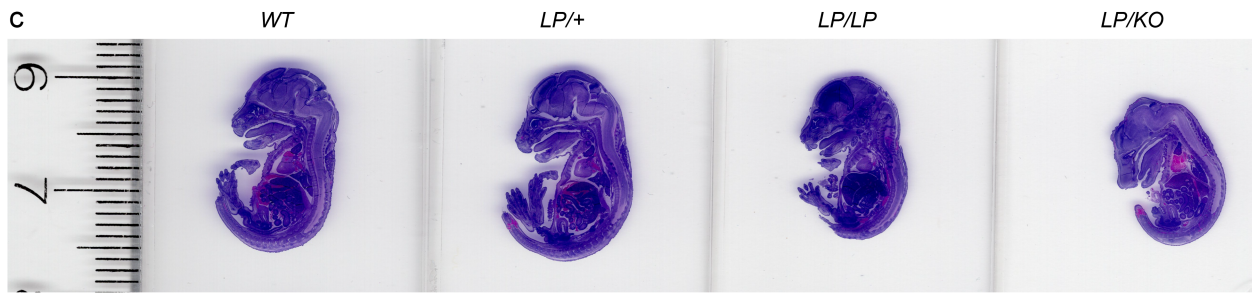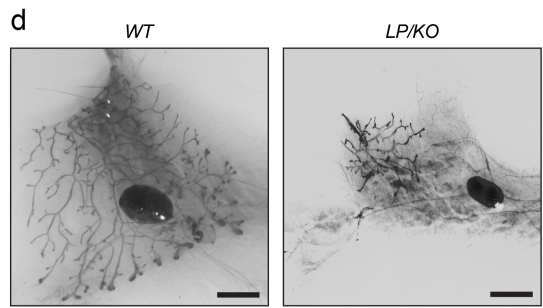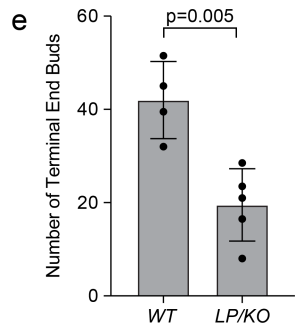

**Supplementary Figure 3: Evaluation of genomic instability and protection of stalled replication forks in MEFs**

a) Quantification of chromosomal aberrations observed in MEFs of indicated genotypes after 100nM MMC treatment shown in Figure 3c (n=3 MEFs , error bar- SD of mean). b) Scatter plot showing ratio of CldU:IdU (green:red) DNA fibers of MEFs of indicated genotypes after replication forks were stalled by 4mM HU treatment for 3hrs. *Brcaldell1* MEFs were used as control for unprotected forks (n=200-300 fibers, error bar- SD of mean).

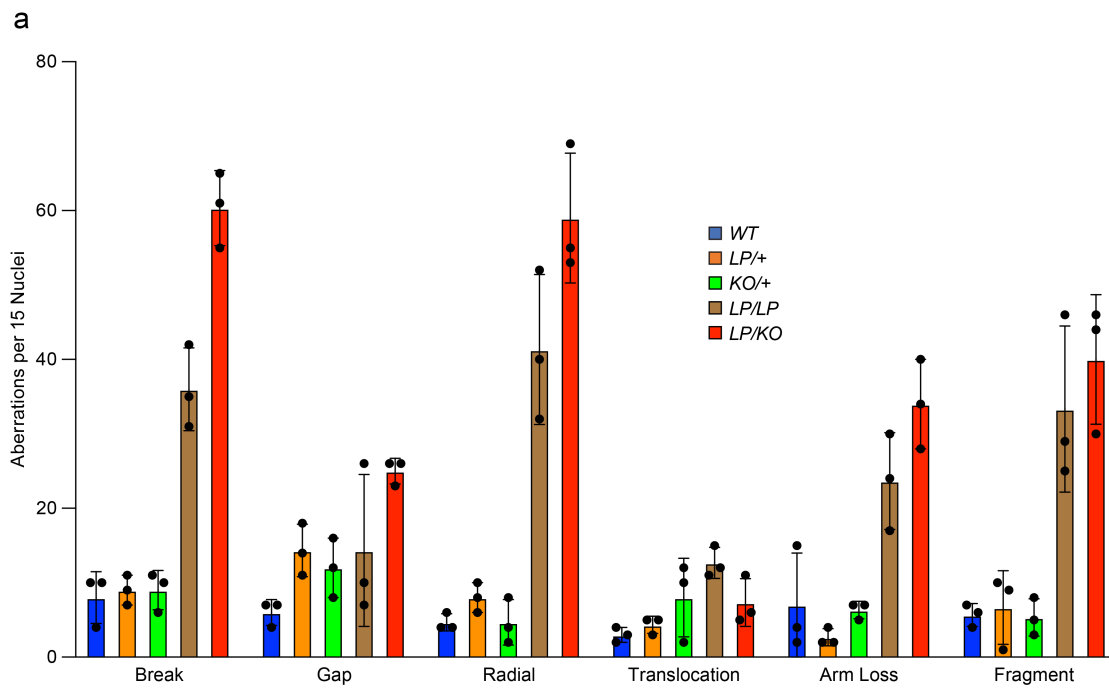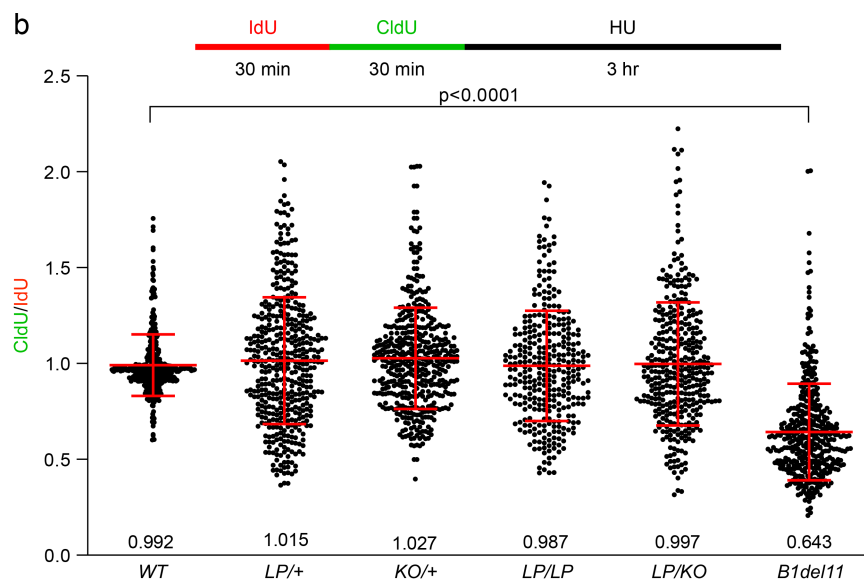

**Supplementary Figure 4: Histological analysis of testis and ovary of mutant and control mice.**

a) H&E (upper panel) and TUNEL (lower panel) stained testes sections of 4-week old mice of indicated genotypes. H&E staining reveals normal microscopic testis morphology in all the genotypes. TUNEL staining suggests lack of abnormal apoptosis in the gonads of any genotype (n=3 mice per genotype, upper panel scale bar=50 $\mu$ m ,lower panel scale bar=200 $\mu$ m). b) H&E staining of 5-6 weeks old mice ovaries. Distinct Corpus lutea and developing follicles can be seen in each genotype (n=3 mice per genotype, scale bar=300 $\mu$ m). c) Representative immunofluorescence images of spermatocyte spreads from 4-week old mice of indicated genotypes in late pachytene/diplotene stages. The synapsed chromosomes are labeled with SCP3.  $\gamma$ H2AX cloud can only be observed over the sex chromosomes in all the genotypes (scale bar=5 $\mu$ m). d) Quantification of the number of  $\gamma$ H2AX foci observed per spermatocyte (error bar-SD of mean).

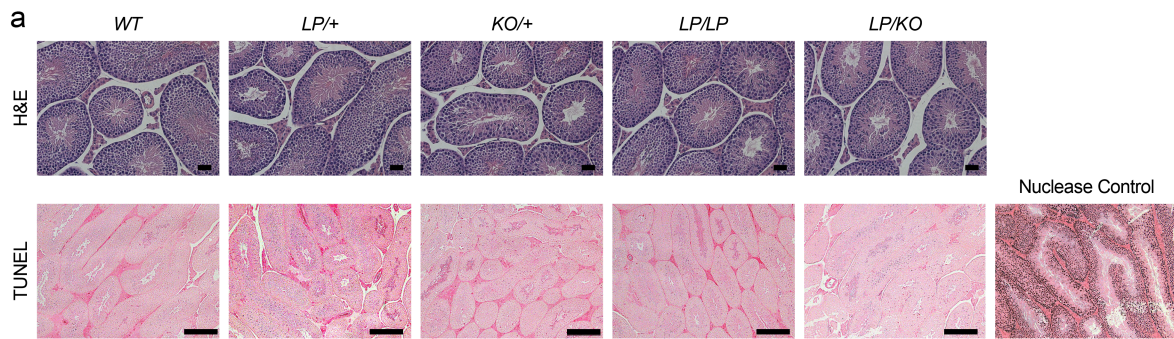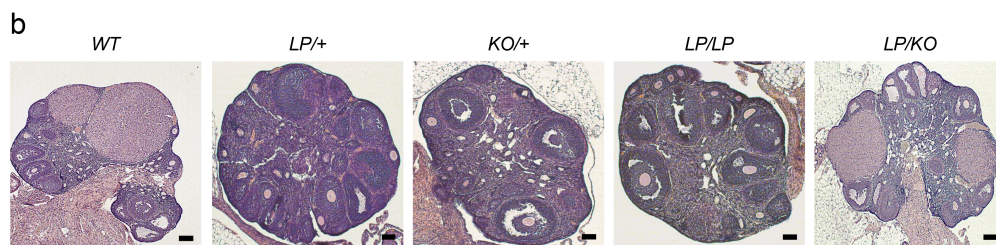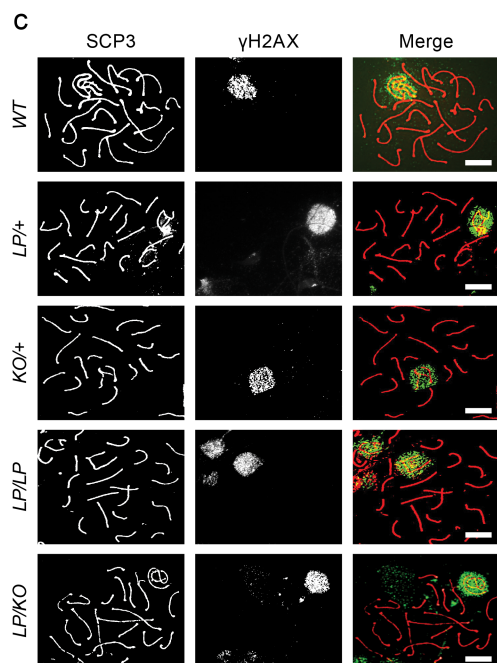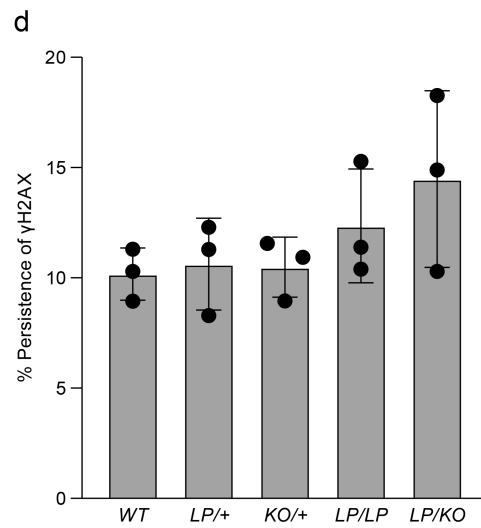



**Supplementary Figure 5: Effect of *Dss1* overexpression or heterozygosity on RAD51 foci formation.**

a) Quantitative RT-PCR analyses to examine relative *Dss1* expression in MEFs transfected with vehicle or *Dss1* overexpression plasmid. b) Representative immunofluorescence images of MEFs of indicated genotypes for RAD51 loading after radiation induced DSBs with and without DSS1 overexpression. DSBs are marked by  $\gamma$ H2AX and nuclei with DAPI (scale bar=5 $\mu$ m). c) Quantification of RAD51 foci per  $\gamma$ H2AX positive nuclei in vehicle treated and DSS1 overexpressing cells. No significant change in the percentage RAD51 positive nuclei was observed in any genotype (n=3 biological replicates, ns-not significant, Students two-tailed t-Test, error bar-SD of mean). d) Representative immunofluorescence images of spermatocyte spreads from 4-week old mice of indicated genotypes on *Dss1*<sup>+/-</sup> background in early pachytene stages. The synapsed chromosomes are labeled with SCP3 (scale bar=5 $\mu$ m). e) Quantification of number of RAD51 foci observed per spermatocyte spread.

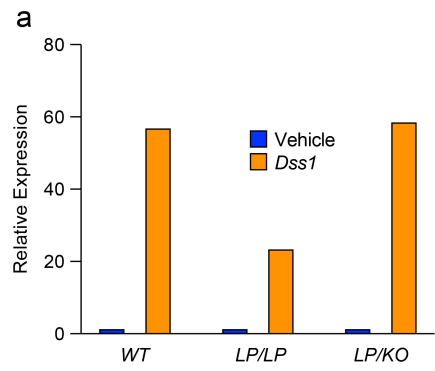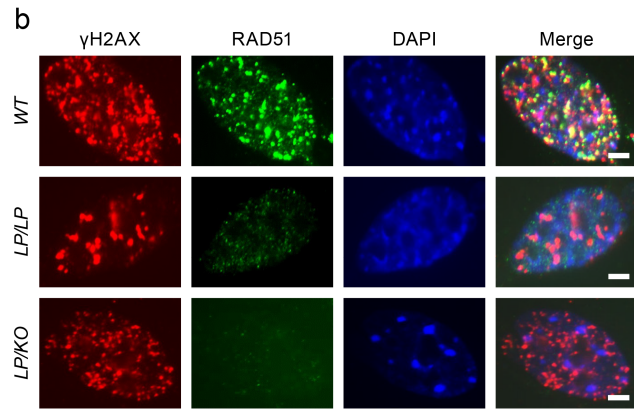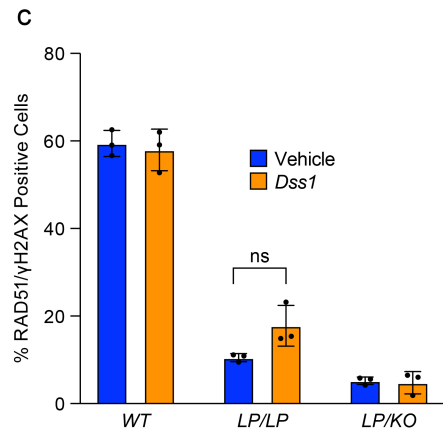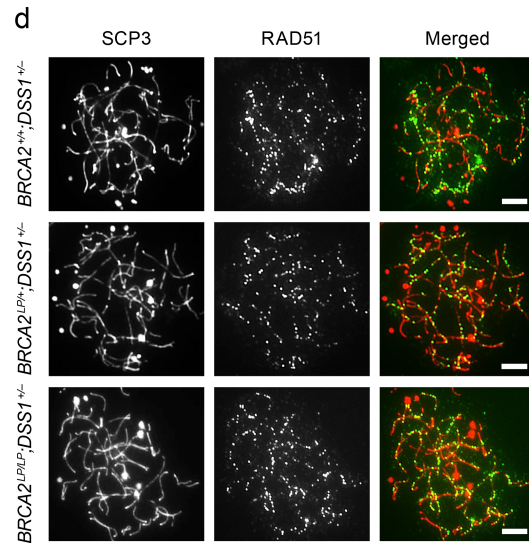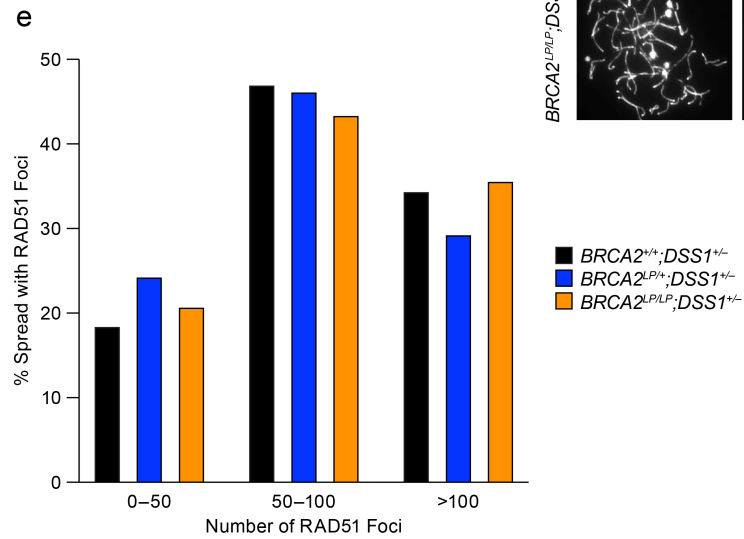

**Supplementary Figure 6: Homologous recombination-mediated repair of radiation induced DSBs and Spo11-generated DSBs during meiosis I.**

a) Schematic representation of different steps of homologous recombination occurring after radiation induced DSBs in somatic cells. DSS1 bound to BRCA2 displaces RPA32 from single stranded DNA (ssDNA) and facilitates loading of RAD51. RAD51 loaded ssDNA searches for homology resulting in strand invasion and D-loop formation. b) Schematic representation of different steps of homologous recombination occurring during meiosis I. The homologous chromosomes pair and condense together pre-leptotene and SPO11 mediated DSBs are generated. During pachytene, these DSBs get repaired by homologous recombination forming synaptonemal complex.

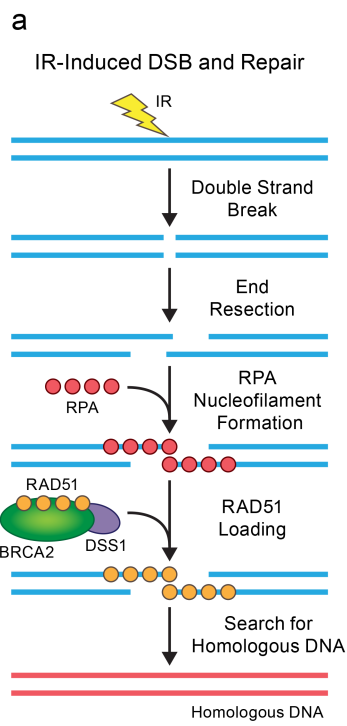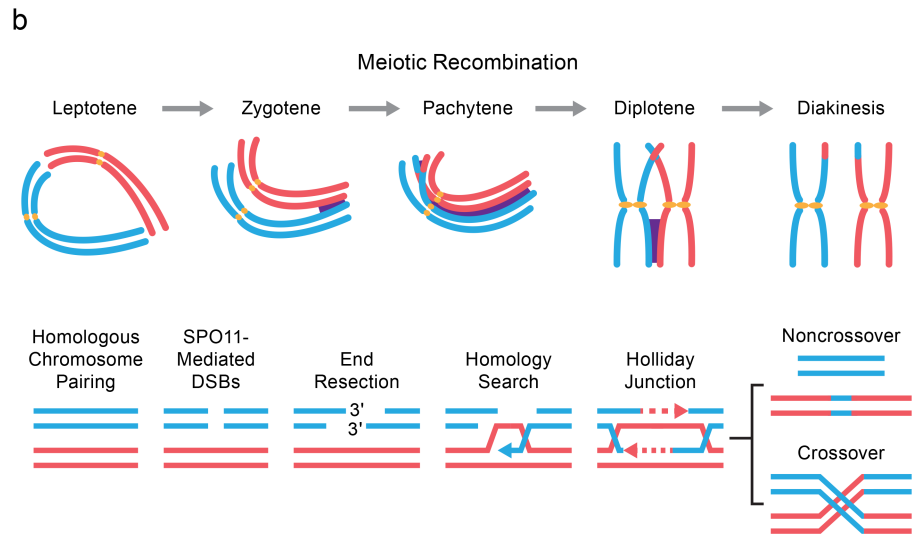

**Supplementary Figure 7: EdU labeling and 53BP1 foci in MEFs in response to IR and Camptothecin treatment.**

a) Representative immunofluorescence images of EdU labeling in WT MEF after indicated treatments. DSBs are marked with  $\gamma$ H2AX and nuclei with DAPI (scale bar=10 $\mu$ m, experiment done with one WT MEF with different treatments). b) Representative immunofluorescence images of 53BP1 foci in MEFs of indicated genotypes exposed to IR or camptothecin. DSBs are marked with  $\gamma$ -H2AX and nuclei with DAPI (scale bar=5 $\mu$ m). c) Quantification of 53BP1 foci per  $\gamma$ H2AX positive nuclei in untreated, IR treated and camptothecin treated cells. d) Chromosomal aberrations in MEFs of indicated genotype, untreated (top panels), 30nM camptothecin treated (middle panel) and 10nM olaparib (lower panel) treated. Chromosomal aberrations are marked with circles (scale bar=5 $\mu$ m). Quantification of these aberrations are shown in Fig. 5f.

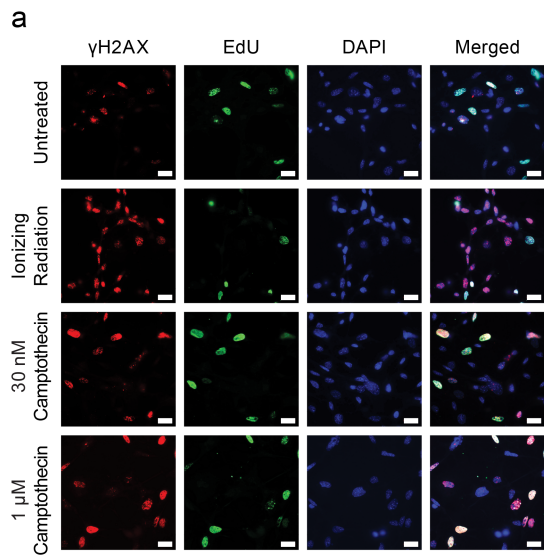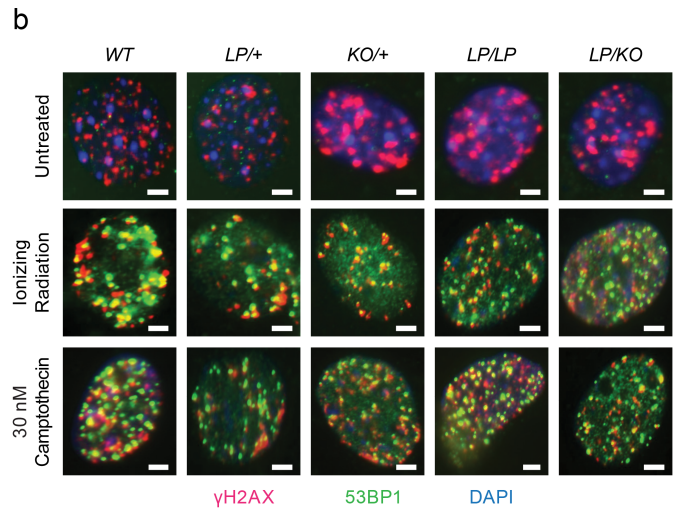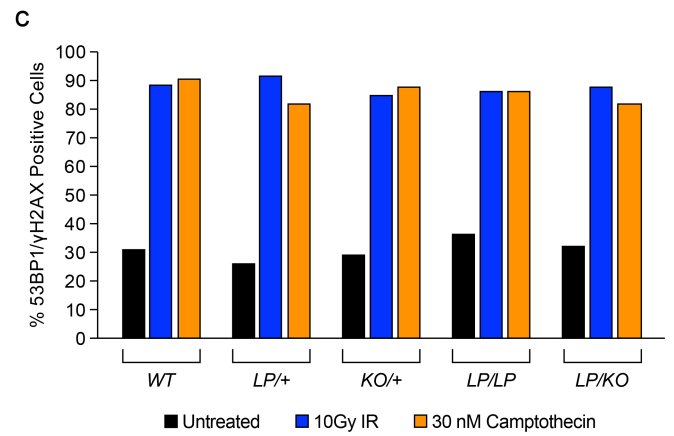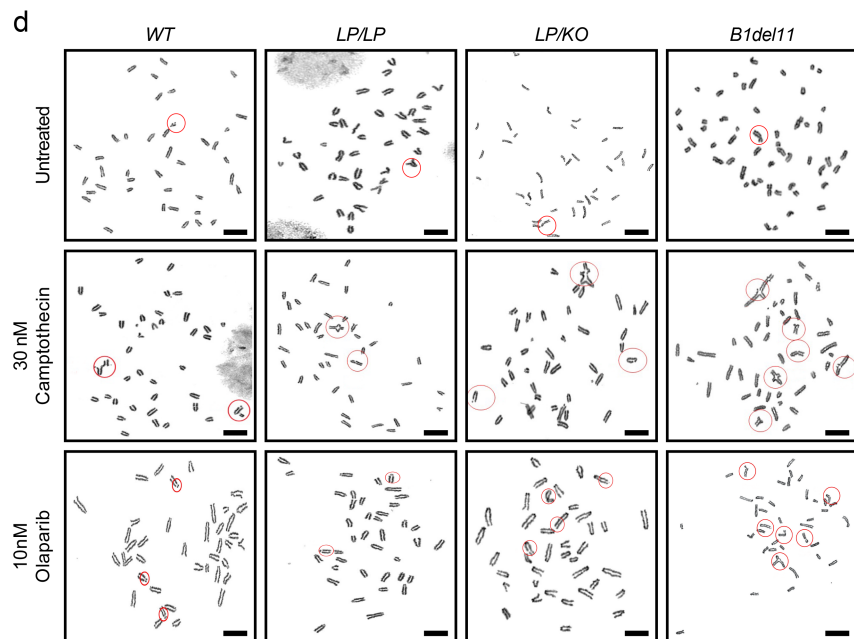

**Supplementary Figure 8: RAD51 foci at radiation and camptothecin induced DSBs in adult fibroblasts**

a) Representative immunofluorescence images of RAD51 foci in adult fibroblasts of indicated genotypes exposed to 10Gy IR or 30nM camptothecin. DSBs are marked with  $\gamma$ H2AX and nuclei with DAPI (scale bar=5 $\mu$ m). b) Quantification of RAD51 foci per  $\gamma$ H2AX positive nuclei. Mutant MEFs are deficient in radiation induced RAD51 foci formation (n=3 biological replicates, Students two-tailed t-Test, error bar- SD of mean), but they show significant increase in RAD51 foci positive cells after camptothecin treatment (n=3, error bar- SD of mean).

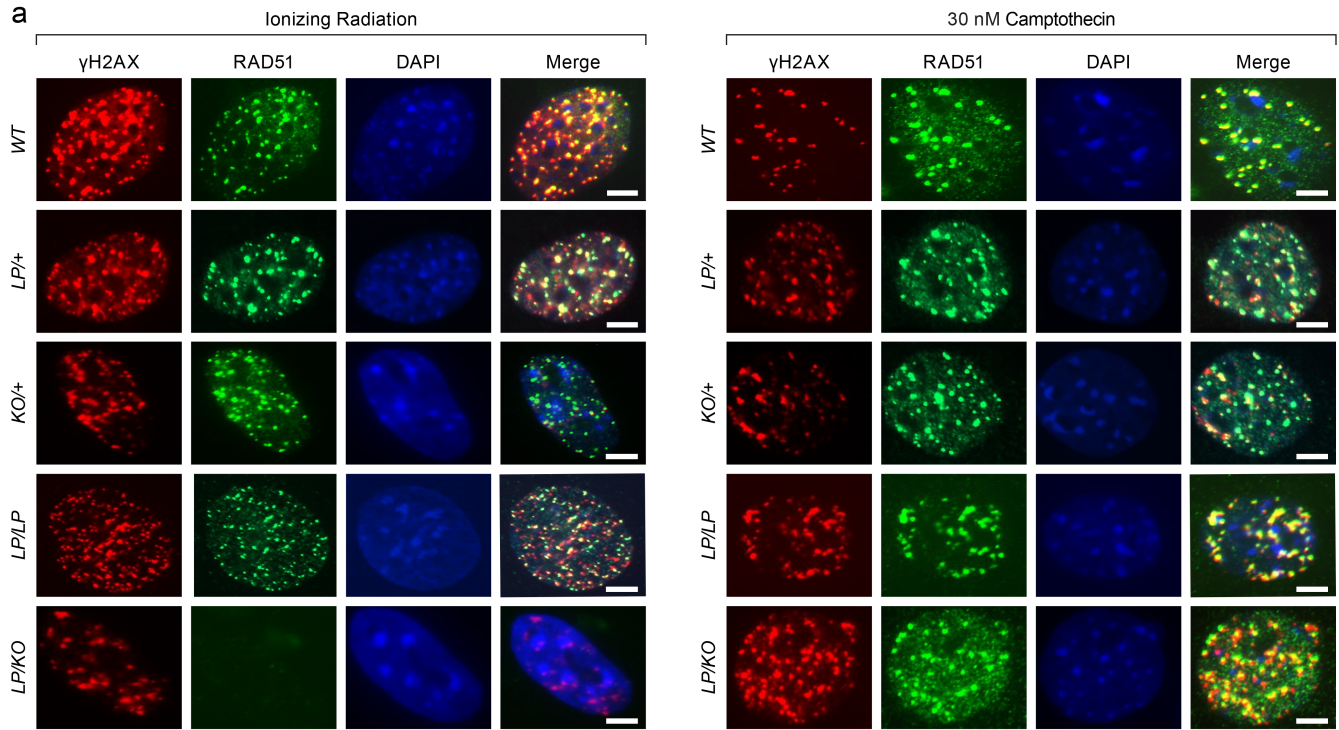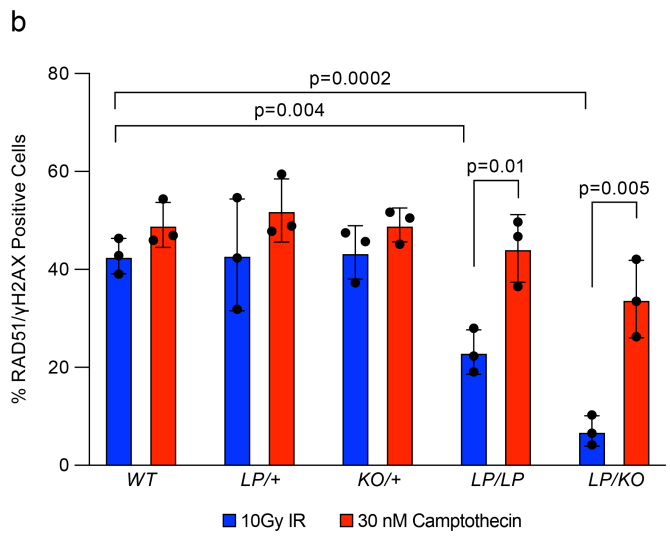



**Supplementary Figure 9: CRISPR/Cas9-based homologous recombination assay.**

a) Sequence of functional Blasticidin resistance gene (top) and the 29bp deletion that renders cells sensitive to blasticidin (bottom). Sequence of the donor DNA used to repair the 29bp deletion by HR is in the middle. PAM site in the blasticidin gene that was used to target by gRNA to generate DSB is marked by red box. b) Representative plates showing mESC colonies obtained in WT and BRCA2<sup>L2510P</sup> complemented *Brca2*<sup>KO/KO</sup> mESCs after transfection of Cas9 and gRNA expression vector and regular or biotinylated donor DNA. Colonies shown here were grown in media without blasticidin and the colony numbers were used as plating control with a dilution factor of 1:5000 to calculate HR frequency.

**a**

Full length Blast<sup>i</sup>R AGCTGCCGCAGCAGCAGCAGTGCCCAGCACCACGAGTTCTGCACAAGGTCCCCCAGTAAA  
Donor DNA with PAM Mutation AGCTGCCGCAGCAGCAGCAGTGCCCAGCACCACGAGTTCTGCACAAGGTCCCCCAGTAAA  
Blast<sup>i</sup>R Δ29bp AGCTGCCGCAGCAGCAGCAGTGC-----CCAGTAAA  
\*\*\*\*\* \*\*\*\*\*

**b**

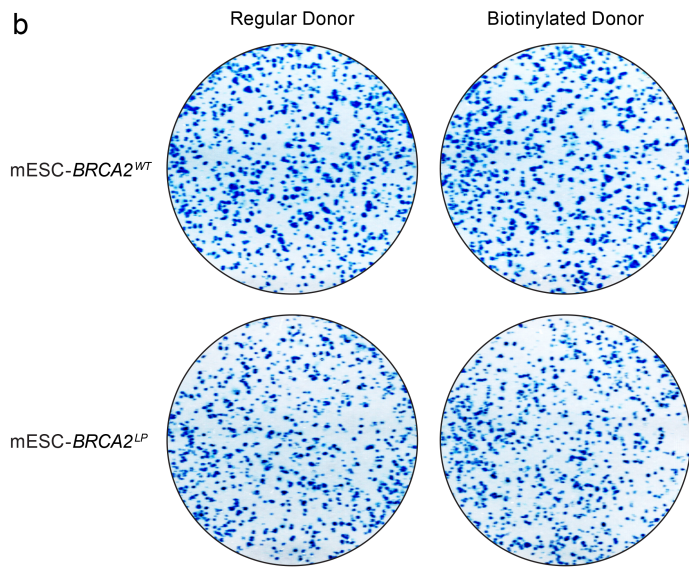

**Supp Table 1: Average litter size of mating of mice of various genotypes**

| Mating (genotype of parents) | Average litter size (n) |
|------------------------------|-------------------------|
| <i>LP/+ X +/+</i>            | 7.44 (16)               |
| <i>LP/+ X LP/+</i>           | 5.93 (20)               |
| <i>LP/LP X +/+</i>           | 6.41 (12)               |
| <i>LP/KO X +/+</i>           | 5.2 (5)                 |
| <i>LP/LP X LP/LP</i>         | 4.45 (24)               |
| <i>LP/LP X LP/KO</i>         | 3.72 (18)               |
| <i>LP/KO X LP/KO</i>         | 3.22 (23)               |

n represents number of litters

**Supp Table 2: Observed and expected number of offspring of various genotypes obtained from *Brca2*<sup>LP/+</sup>;*Dss1*<sup>+/-</sup> X *Brca2*<sup>KO/+</sup>;*Dss1*<sup>+/-</sup> cross**

| Genotype                                                   | Observed | Expected | Mendelian Ratio | $\chi^2$ p-value |
|------------------------------------------------------------|----------|----------|-----------------|------------------|
| <i>Brca2</i> <sup>+/+</sup> ; <i>Dss1</i> <sup>+/+</sup>   | 15       | 9.625    | 1               | 1.76437E-17      |
| <i>Brca2</i> <sup>LP/+</sup> ; <i>Dss1</i> <sup>+/-</sup>  | 32       | 19.25    | 2               |                  |
| <i>Brca2</i> <sup>KO/+</sup> ; <i>Dss1</i> <sup>+/-</sup>  | 32       | 19.25    | 2               |                  |
| <i>Brca2</i> <sup>LP/+</sup> ; <i>Dss1</i> <sup>+/+</sup>  | 20       | 9.625    | 1               |                  |
| <i>Brca2</i> <sup>KO/+</sup> ; <i>Dss1</i> <sup>+/+</sup>  | 14       | 9.625    | 1               |                  |
| <i>Brca2</i> <sup>LP/KO</sup> ; <i>Dss1</i> <sup>+/+</sup> | 6        | 9.625    | 1               |                  |
| <i>Brca2</i> <sup>LP/KO</sup> ; <i>Dss1</i> <sup>+/-</sup> | 0        | 19.25    | 2               |                  |
| <i>Brca2</i> <sup>+/+</sup> ; <i>Dss1</i> <sup>+/-</sup>   | 35       | 19.25    | 2               |                  |
| <i>Brca2</i> <sup>LP/KO</sup> ; <i>Dss1</i> <sup>+/-</sup> | 0        | 9.625    | 1               |                  |
| <i>Brca2</i> <sup>LP/+</sup> ; <i>Dss1</i> <sup>-/-</sup>  | 0        | 9.625    | 1               |                  |
| <i>Brca2</i> <sup>KO/+</sup> ; <i>Dss1</i> <sup>-/-</sup>  | 0        | 9.625    | 1               |                  |
| <i>Brca2</i> <sup>+/+</sup> ; <i>Dss1</i> <sup>-/-</sup>   | 0        | 9.625    | 1               |                  |

**Supp Table 3: List of primers used in the study**

| Sequence                                                                       | Amplicon size               | Application                                                       |
|--------------------------------------------------------------------------------|-----------------------------|-------------------------------------------------------------------|
| LP Fwd- ttagcctcacagcctctcctcgt<br>LP Rev- agagggccctatcaggtgtt                | WT- 204bp<br>Mutant-320bp   | Genotyping for I2510P locus                                       |
| Hprt fwd- acagcatctaagaagtttgtctgtcctgg<br>E11 R- ctcaacagagtaggttctttgg       | WT- no band<br>Mutant-450bp | Genotyping for <i>Brca2</i><br>Knockout allele                    |
| Delta neoS- ggctggtgtgactgacaggat<br>Delta nesAS- ggcaaagcaggtgaactgtgt        | WT- 716bp<br>Mutant-242bp   | Genotyping of DSS1 mutant animals                                 |
| Dss1 rtf- cgacgagttcgaggagtctc<br>Dss1 rtr- ttctccagctcagcacgtaa               | 138bp                       | qPCR                                                              |
| Gapdh f-tgcccccatgtttgtgatg<br>Gapdh r-tgtggtcatgagcccttc                      | 151bp                       | qPCR                                                              |
| Blasti F- atcaacagcatccccatctc<br>Blasti R1- gcaattcacgaatcccaact              | 312bp                       | Cloning Blasticidin homologous donor DNA in TopoTA vector         |
| Blasti F- atcaacagcatccccatctc<br>Blasti R2- tagccctcccacacataacc              | WT- 339bp<br>mutant- 310bp  | Genotyping Blasticidin resistant colonies                         |
| Blasti sgF- caccgactgggcactgctgctgctg<br>Blasti sgR- aaaccagcagcagcagtgcccagtc | 20bp                        | Guide RNA for targeting mutant Blasticidin gene using CRISPR/Cas9 |
