# Supplementary material for: BRCA2-DSS1 interaction is dispensable for RAD51 recruitment at replication-induced and meiotic DNA double strand breaks
Source: PubMed Central journal article supplement (PMC8975877; doi:10.1038/s41467-022-29409-y), 2022-04-01
Supplement: 41467_2022_29409_MOESM3_ESM.pdf [file 41467_2022_29409_MOESM3_ESM.pdf]

## Description of Additional Supplementary Information

### SUPPLEMENTARY FIGURES

**Supplementary Figure 1:** Generation of *Brca2*<sup>L2431P</sup> knock-in mice.

**Supplementary Figure 2:** Whole mount of embryos and mammary gland .

**Supplementary Figure 3:** Evaluation of genomic instability and protection of stalled replication forks in MEFs

**Supplementary Figure 4:** Histological analysis of testis and ovary of mutant and control mice.

**Supplementary Figure 5:** Effect of *Dss1* overexpression or heterozygosity on RAD51 foci formation.

**Supplementary Figure 6:** Homologous recombination-mediated repair of radiation induced DSBs and Spo11-generated DSBs during meiosis I.

**Supplementary Figure 7:** EdU labeling and 53BP1 foci in MEFs in response to IR and Camptothecin treatment

**Supplementary Figure 8:** RAD51 foci at radiation and camptothecin induced DSBs in adult fibroblasts

**Supplementary Figure 9:** CRISPR/Cas9-based homologous recombination assay.

### SUPPLEMENTARY TABLES

**Supp Table 1:** Average litter size of mating of mice of various genotypes

**Supp Table 2:** Observed and expected number of offspring of various genotypes obtained from

*Brca2*<sup>LP/+</sup>;*Dss1*<sup>+/-</sup> X *Brca2*<sup>KO/+</sup>;*Dss1*<sup>+/-</sup> cross

**Supp Table 3:** List of primers used in the study
